# Supplementary material for: A benzimidazolium-based new flexible cleft built on the piperazine unit: a case of selective fluorometric sensing of ATP
Source: Royal Society of Chemistry journal article supplement (doi:10.1039/c4ra11683f), 2014-01-01

## Benzimidazolium-based new flexible cleft built on piperazine unit: A case of selective fluorometric sensing of ATP

Kumares Ghosh<sup>\*a</sup>, Debojyoti Tarafdar<sup>a</sup>, Asmita Samadder<sup>b</sup> and Anisur Rahman Khuda- Bukhsh<sup>b</sup>

<sup>a</sup>Department of Chemistry, University of Kalyani, Kalyani-741235, India. Email: ghosh\_k2003@yahoo.co.in, Fax: +913325828282; Tel: +913325828750; <sup>b</sup>Department of Zoology, University of Kalyani, Kalyani-741235, India.

### 1. Change in emission of receptor 1 with various anions of sodium salt in CH<sub>3</sub>CN-H<sub>2</sub>O (1:1/v/v, using 10 mM HEPES, pH 6.4).

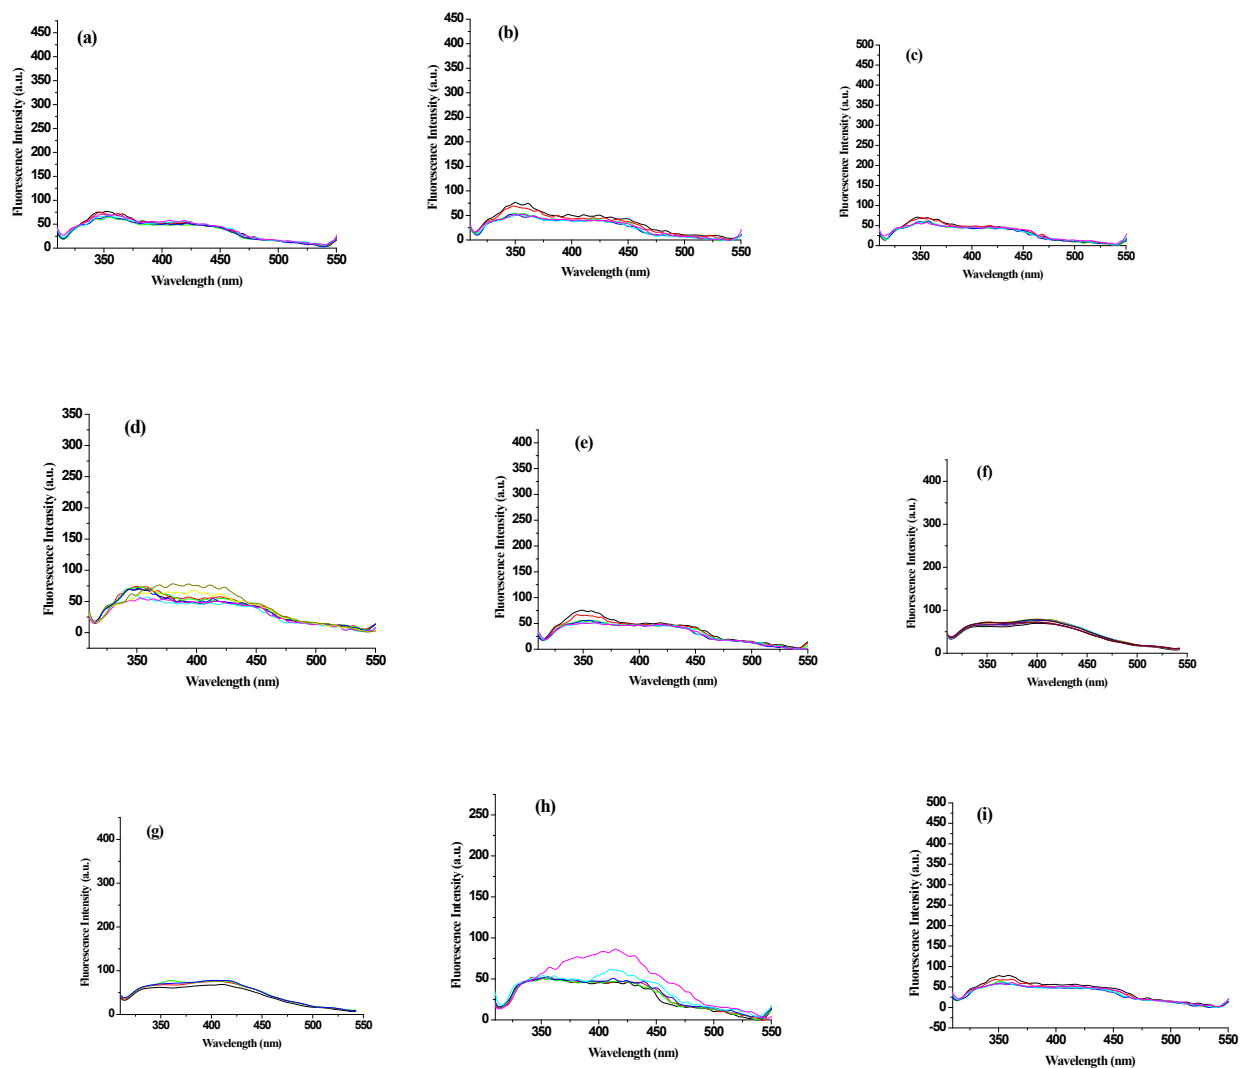

**Figure 1S.** Change in emission of **1** ( $c = 2.5 \times 10^{-5}$  M) in CH<sub>3</sub>CN-H<sub>2</sub>O (1:1/v/v, using 10 mM HEPES, pH 6.4) upon addition of (a) Na<sub>3</sub>PO<sub>4</sub>, (b) Na<sub>2</sub>HPO<sub>4</sub>, (c) NaH<sub>2</sub>PO<sub>4</sub>, (d) ADP, (e) AMP, (f) Na<sub>3</sub>HP<sub>2</sub>O<sub>7</sub>, (g) Na<sub>4</sub>P<sub>2</sub>O<sub>7</sub>, (h) G1P, (i) G6P; [concentration of anions of sodium salts were  $1 \times 10^{-3}$  M].

2. Change in absorbance of receptor 1 with various anions of sodium salt in CH<sub>3</sub>CN-H<sub>2</sub>O (1:1/v/v, using 10 mM HEPES, pH 6.4).

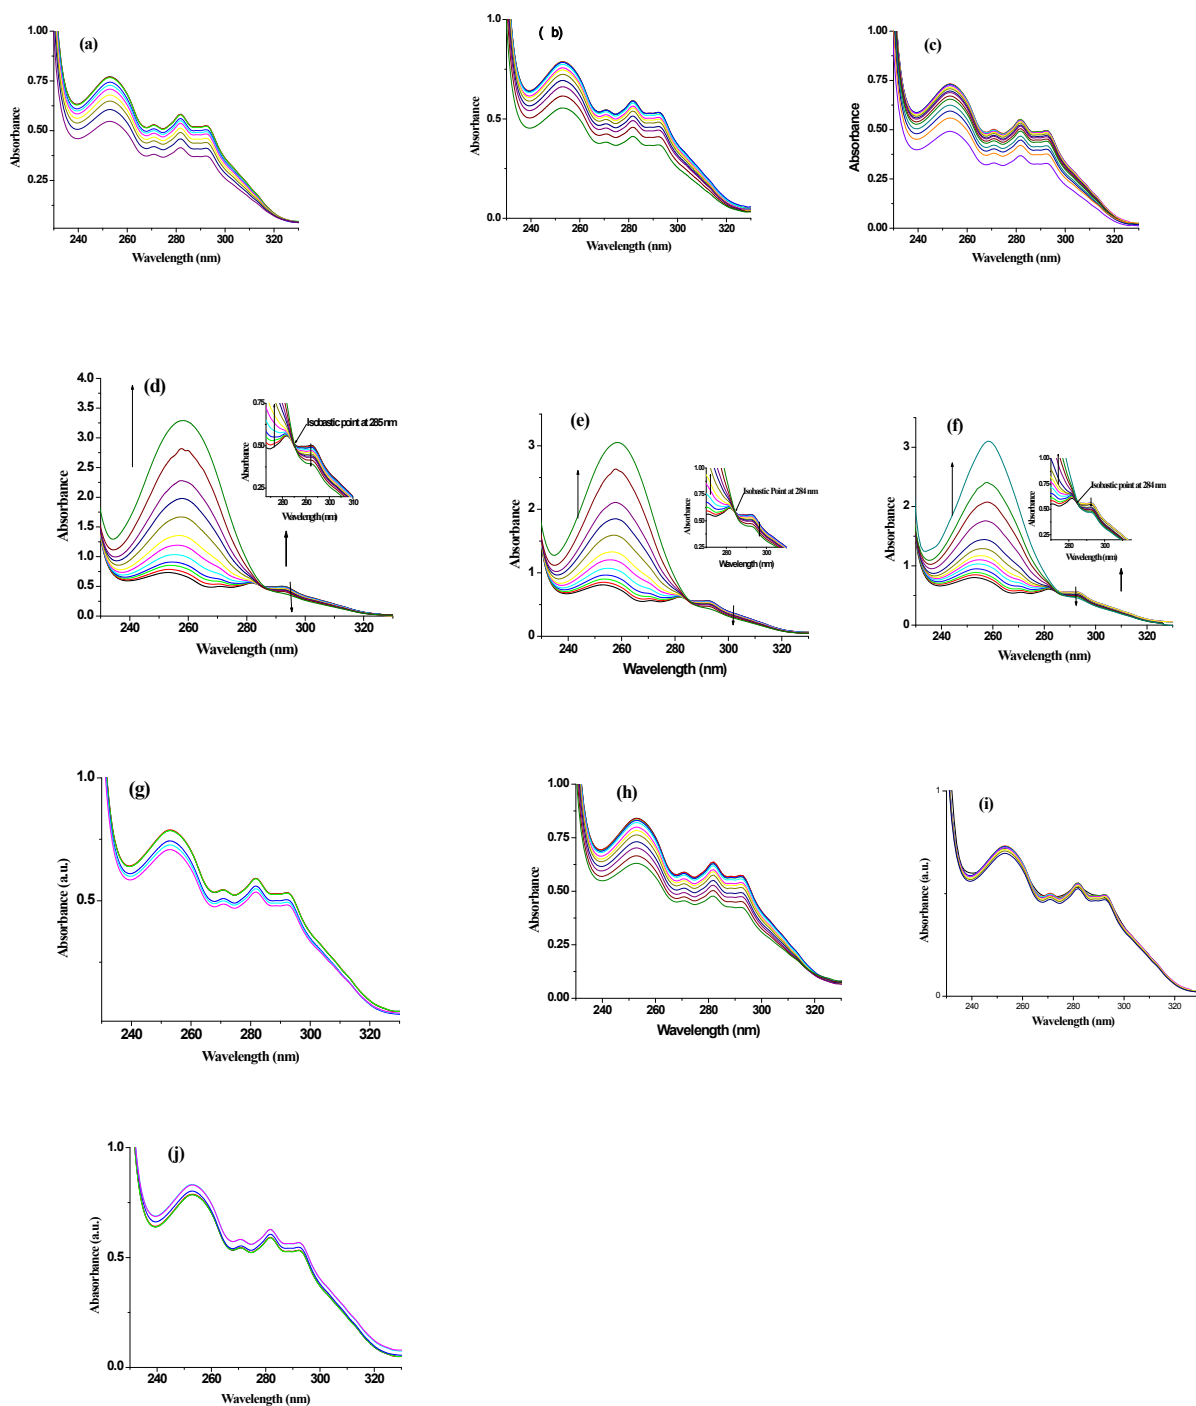

**Figure 2S.** Change in absorbance of **1** ( $c = 2.5 \times 10^{-5}$  M) in CH<sub>3</sub>CN-H<sub>2</sub>O (1:1/v/v, using 10 mM HEPES, pH 6.4) upon addition of (a) Na<sub>3</sub>PO<sub>4</sub>, (b) Na<sub>2</sub>HPO<sub>4</sub>, (c) NaH<sub>2</sub>PO<sub>4</sub>, (d) ADP, (e) AMP, (f) ATP, (g) Na<sub>3</sub>HP<sub>2</sub>O<sub>7</sub>, (h) Na<sub>4</sub>P<sub>2</sub>O<sub>7</sub>, (i) G1P, (j) G6P; [concentration of anions of sodium salts were  $1 \times 10^{-3}$  M].

**3. Change in emission of receptor 1 with various anions of tetrabutylammonium salts in CH<sub>3</sub>CN-H<sub>2</sub>O (1:1/v/v, using 10 mM HEPES, pH 6.4).**

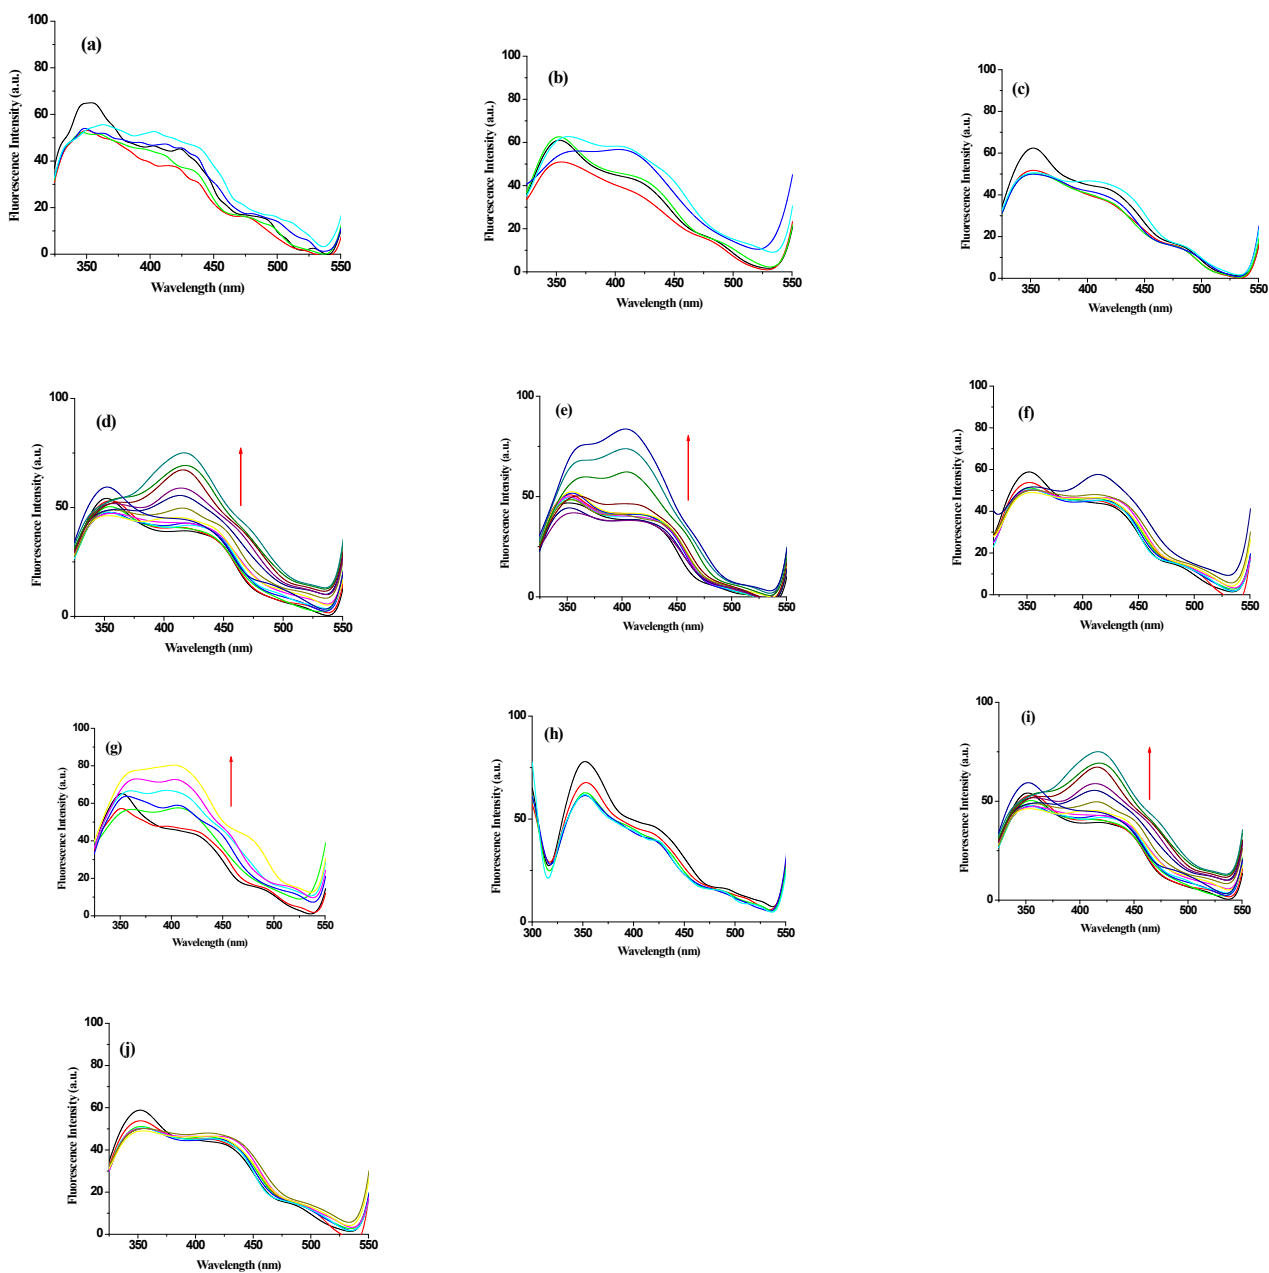

**Figure 3S.** Change in emission of **1** ( $c = 2.5 \times 10^{-5}$  M) in CH<sub>3</sub>CN-H<sub>2</sub>O (1:1/v/v, using 10 mM HEPES, pH 6.4) upon addition of (a) OAc<sup>-</sup>, (b) HSO<sub>4</sub><sup>-</sup>, (c) NO<sub>3</sub><sup>-</sup>, (d) HP<sub>2</sub>O<sub>7</sub><sup>3-</sup>, (e) F<sup>-</sup>, (f) Cl<sup>-</sup>, (g) Br<sup>-</sup>, (h) I<sup>-</sup>, (i) H<sub>2</sub>PO<sub>4</sub><sup>-</sup> and (j) ClO<sub>4</sub><sup>-</sup>; [anions were taken as their tetrabutylammonium salts and their concentrations were  $1 \times 10^{-3}$  M].

#### 4. NOESY spectrum of the complex of 1.ATP

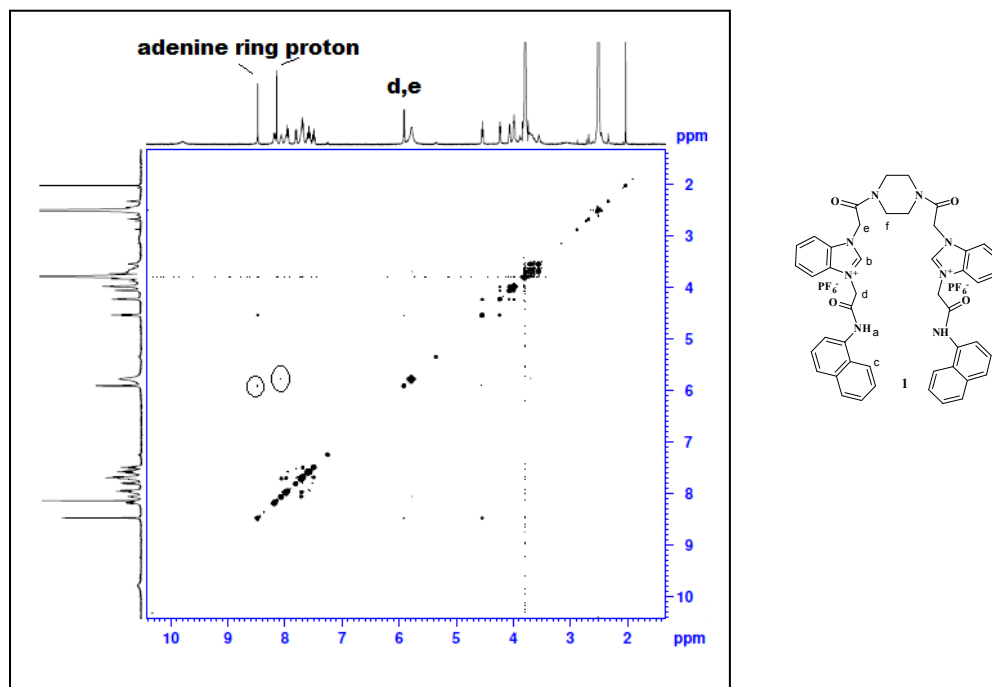

Figure 4S. NOESY spectrum of 1 in the presence of equivalent amount of ATP.

#### 5. MTT assay for receptor 1.

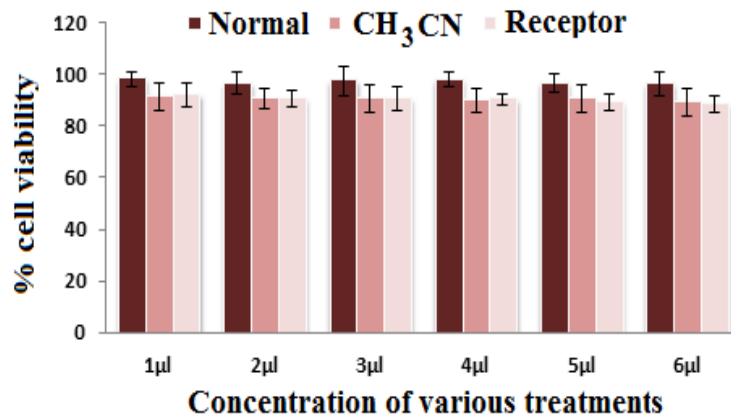

Figure 5S. MTT assay of receptor 1

# Spectral data

<sup>1</sup>H NMR of 1 (400 MHz, d<sub>6</sub>-DMSO):

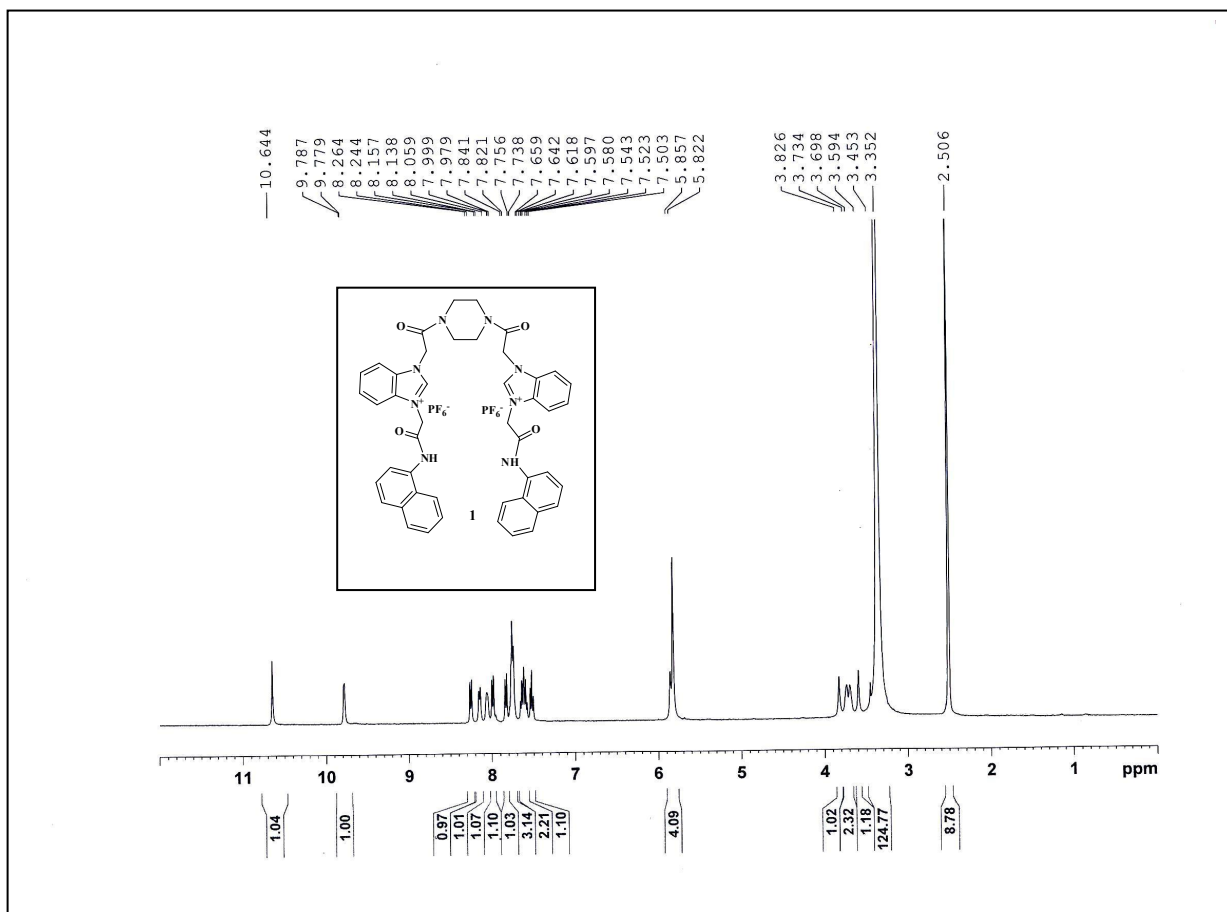

**<sup>13</sup>C NMR of 1 (100 MHz, d<sub>6</sub>-DMSO):**

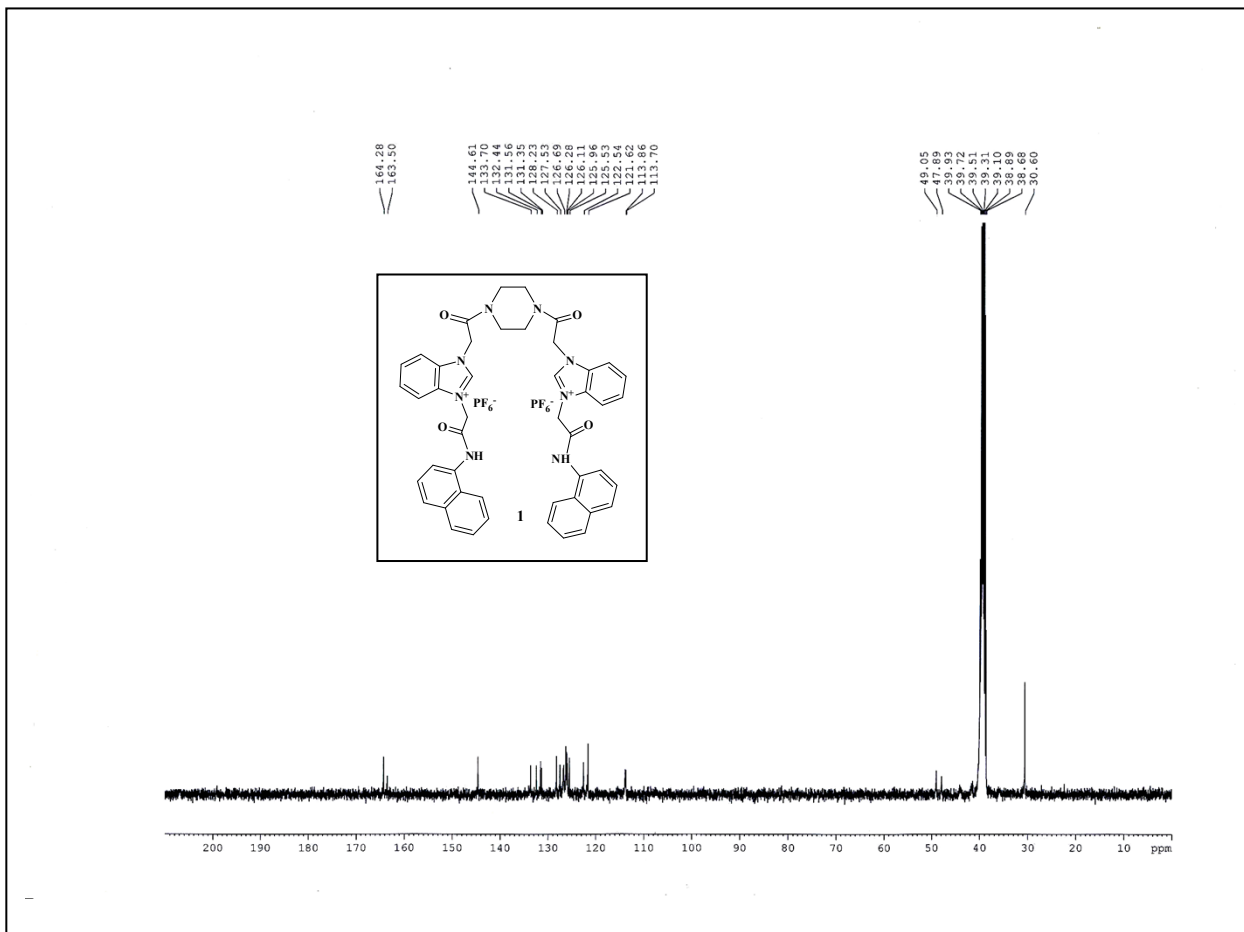

Mass (HRMS) of 1:

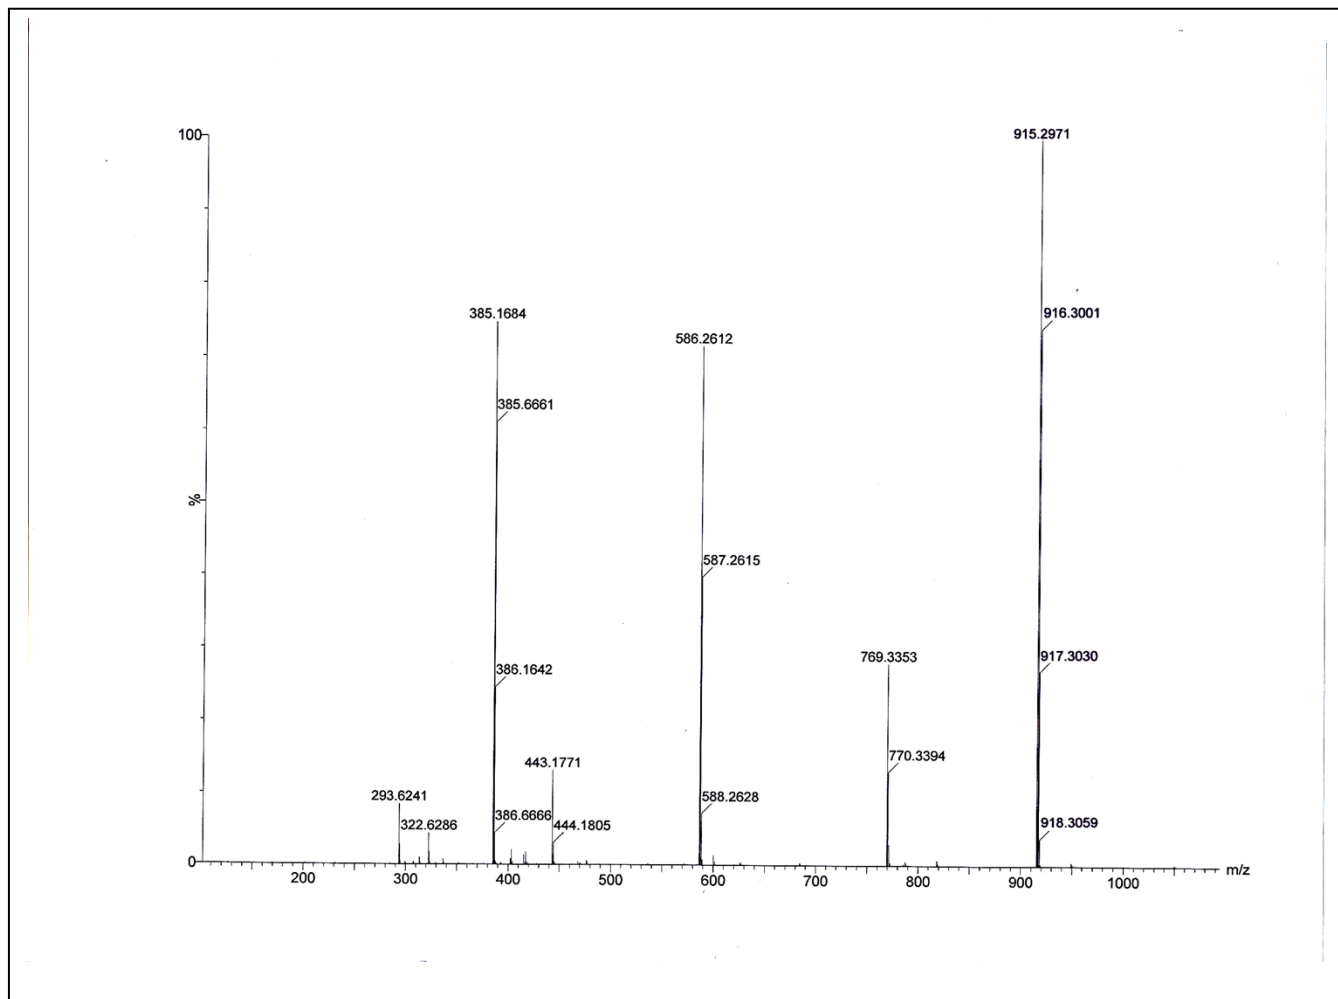

Supplement: c4ra11683f1.pdf [file c4ra11683f1.pdf]
